# Supplementary material for: In Vitro Effect of 9,9′-Norharmane Dimer against Herpes Simplex Viruses
Source: MDPI journal article supplement (doi:10.3390/ijms25094966), 2024-05-02
Supplement: s1 [file s1]

# Supplementary Material

## In Vitro Effect of 9,9'-Norharmane Dimer against Herpes Simplex Viruses

**María Micaela Gonzalez** <sup>1,2,†</sup>, **Maria Guadalupe Vizoso-Pinto** <sup>3,4,5,†</sup>, **Rosa Erra-Balsells** <sup>6,7</sup>, **Thomas Gensch** <sup>8,\*</sup> and **Franco M. Cabrerizo** <sup>1,2,\*</sup>

<sup>1</sup> Instituto Tecnológico de Chascomús (CONICET-UNSAM), Av. Intendente Marino Km 8.2, CC 164 (B7130IWA), Chascomús 7130, Argentina; mgonzalez@intech.gov.ar

<sup>2</sup> Escuela de Bio y Nanotecnologías (UNSAM), San Martín 1650, Argentina

<sup>3</sup> Max von Pettenkofer Institute, Virology, National Reference Center for Retroviruses, Faculty of Medicine, LMU, D-80336 Munich, Germany; mgvizoso@fm.unt.edu.ar

<sup>4</sup> Instituto Superior de Investigaciones Biológicas (INSIBIO), CONICET-UNT, San Miguel de Tucumán 4000, Argentina

<sup>5</sup> Laboratorio Central de Cs. Básicas, Facultad de Medicina, Universidad Nacional de Tucumán, Tucumán 4000, Argentina

<sup>6</sup> Departamento de Química Orgánica, Facultad de Ciencias Exactas y Naturales, Universidad de Buenos Aires, Pabellón II, 3er P., Ciudad Universitaria, Buenos Aires 1428, Argentina; erra@qo.fcen.uba.ar.

<sup>7</sup> Centro de Investigación en Hidratos de Carbono (CIHIDECAR), CONICET, Facultad de Ciencias Exactas y Naturales, Universidad de Buenos Aires, Naturales Pabellón II, 3er P. Ciudad Universitaria, Buenos Aires 1428, Argentina

<sup>8</sup> Institute of Biological Information Processing 1 (IBI-1; Molecular and Cellular Physiology), Forschungszentrum Jülich, Wilhelm-Jonen-Straße, 52428 Jülich, Germany

\* Correspondence: t.gensch@fz-juelich.de (T.G.); fcabrerizo@intech.gov.ar (F.M.C.)

† These authors contributed equally to this work.

**Contents:**

1. Effect of nHo-dimer at different stages of HSV-2. (Page 3)
2. HSV-2 yields in the presence of nHo-dimer. (Page 4)
3. Cellular internalization of 9-Me-nHo and 9-Me-Ho on HEK293 cells characterized by FLIM. (Page 5)
4. Evolution of intracellular 9-Me-nHo fluorescence signal after washing. (Page 6)
5. Evolution of intracellular 9-Me-Ho fluorescence signal after washing. (Page 7)

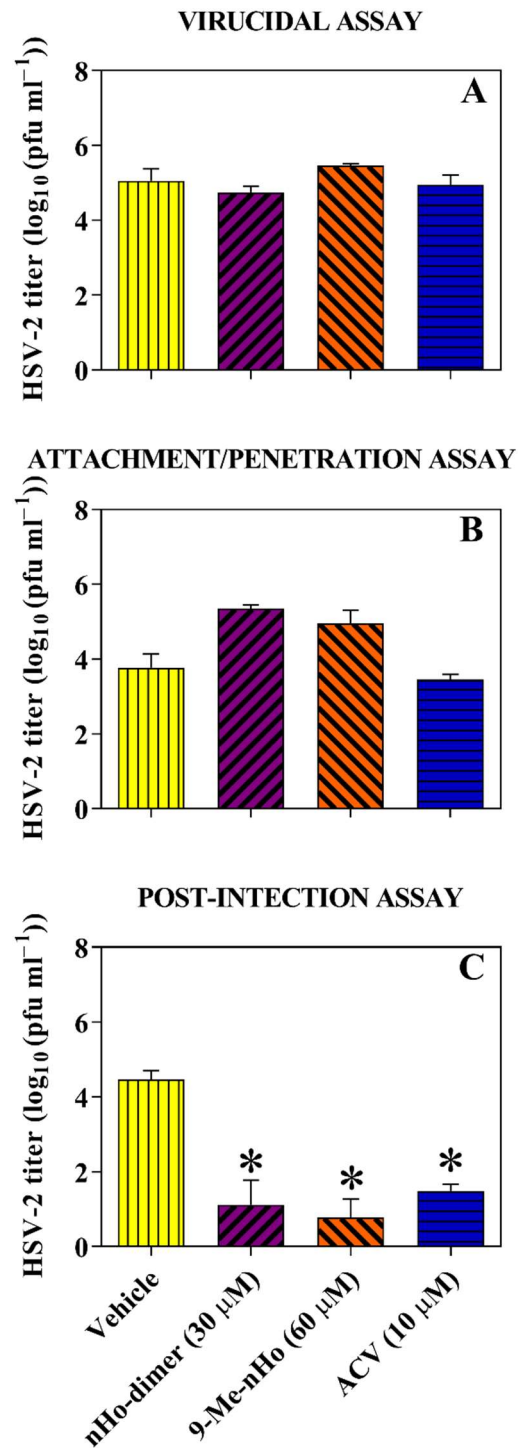

**Figure S1.** Time of addition experiments to further evaluate the effects of nHo-dimer (30  $\mu\text{M}$ ) at three different levels or stages of HSV-2: **A** virucidal assay, **B** attachment/penetration assay, and **C** post-infection assay. Bars are means  $\pm$  SE of viral titers, obtained by titration of cell lysates (duplicates) and they are representative of two independent experiments with similar results. Statistical differences ( $p < 0.05$ ) are indicated as (\*). ANOVA/Dunnett's tests were performed for each compound and compared to the respective controls. For comparative reasons, results for 9-Me-nHo (60  $\mu\text{M}$ ) and ACV (10  $\mu\text{M}$ ), obtained under identical experimental conditions reported in the literature [15] are included.

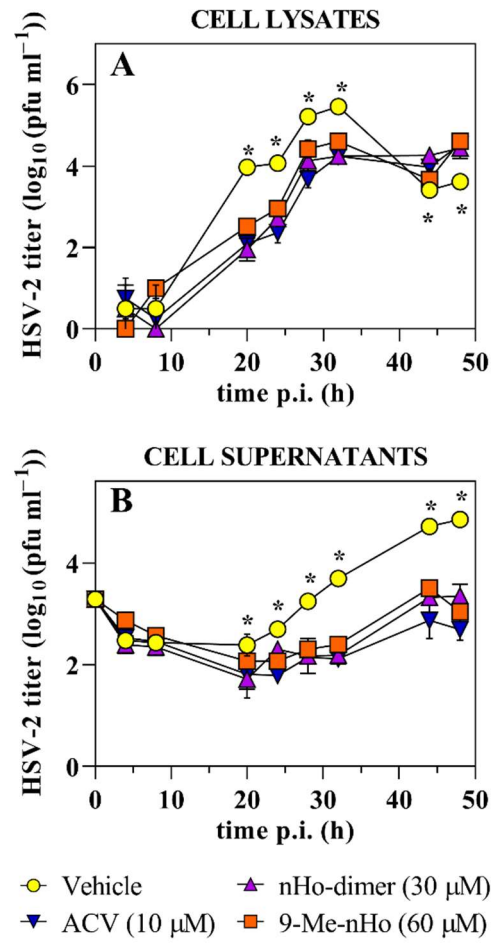

**Figure S2.** HSV-2 yields in the presence of nHo-dimer (30  $\mu\text{M}$ ) or the vehicle. The values were obtained by means of virus titration of cell lysates (**A**) or cell supernatants (**B**) and represent the mean of duplicates ( $\pm$  SD). \* indicates significant differences between samples treated with nHo-dimer or the vehicle ( $p < 0.05$ , multiple t-test / Holm-Sidak method). For comparative reasons data reported for 9-Me-nHo (60  $\mu\text{M}$ ) and ACV (10  $\mu\text{M}$ ) are included [15].

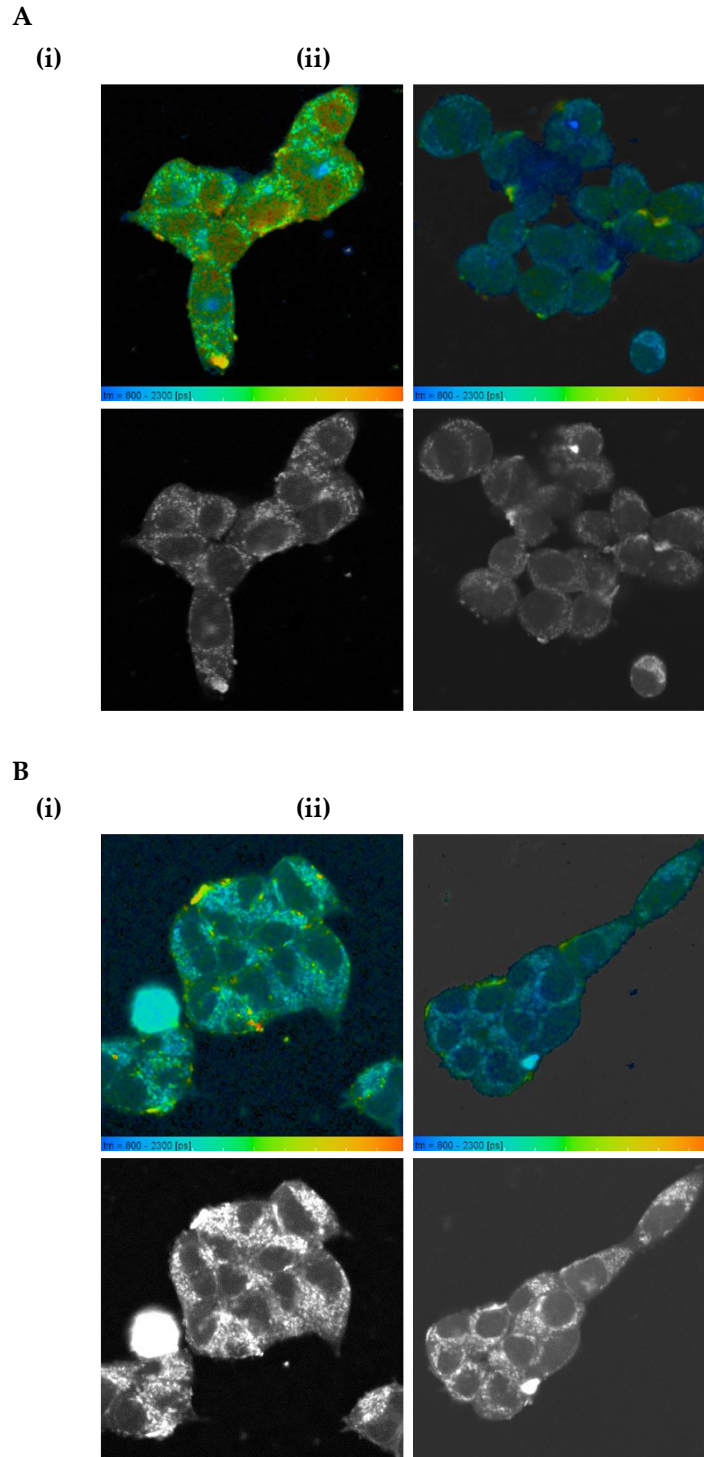

**Figure S3.** (i) Representative fluorescence lifetime (colored) and intensity (black & white) images of HEK293 cells incubated for 30 min with 50  $\mu$ M of 9-Me-nHo and 9-Me-Ho (**A** and **B**, respectively), recorded under two-photon excitation at wavelength 840 nm, using the bp allvis emission filter. Column (ii) depicts representative fluorescence images of wt HEK293 cells in the absence of  $\beta$ C. The mean values of average fluorescence lifetime ( $\mu$  / ns) are: (**A.i**) 1.57, (**A.ii**) 0.94, (**B.i**) 1.20 and (**B.ii**) 1.00.

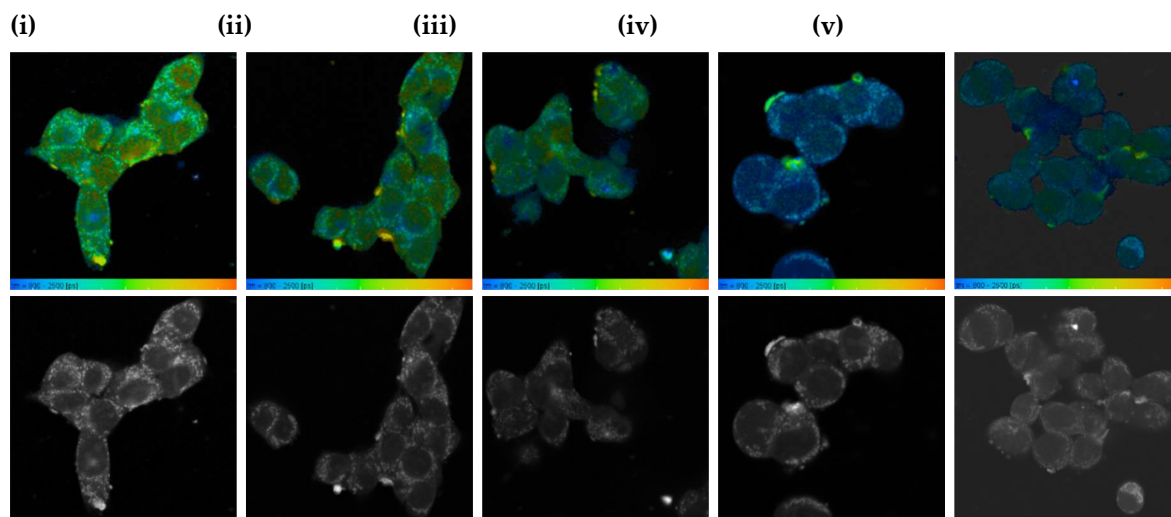

**Figure S4.** Representative fluorescence lifetime (colored) and intensity (black & white) images of HEK293 cells recorded under two-photon excitation at wavelength 840 nm, using the bp allvis emission filter. Columns from **(i)** to **(iv)** depict fluorescence images of HEK293 cells incubated for 30 min with 9-Me-nHo (50  $\mu$ M) and then washed with fresh media, recorded every 5 minutes, respectively. The mean value of average fluorescence lifetime ( $\mu$  / ns) changes from **(i)** 1.57, **(ii)** 1.52, **(iii)** 1.37 and **(iv)** 0.95. Column **(v)** depicts a representative fluorescence image of wt HEK293 cells in the absence of 9-Me-nHo (autofluorescence,  $\mu$  = 0.89).

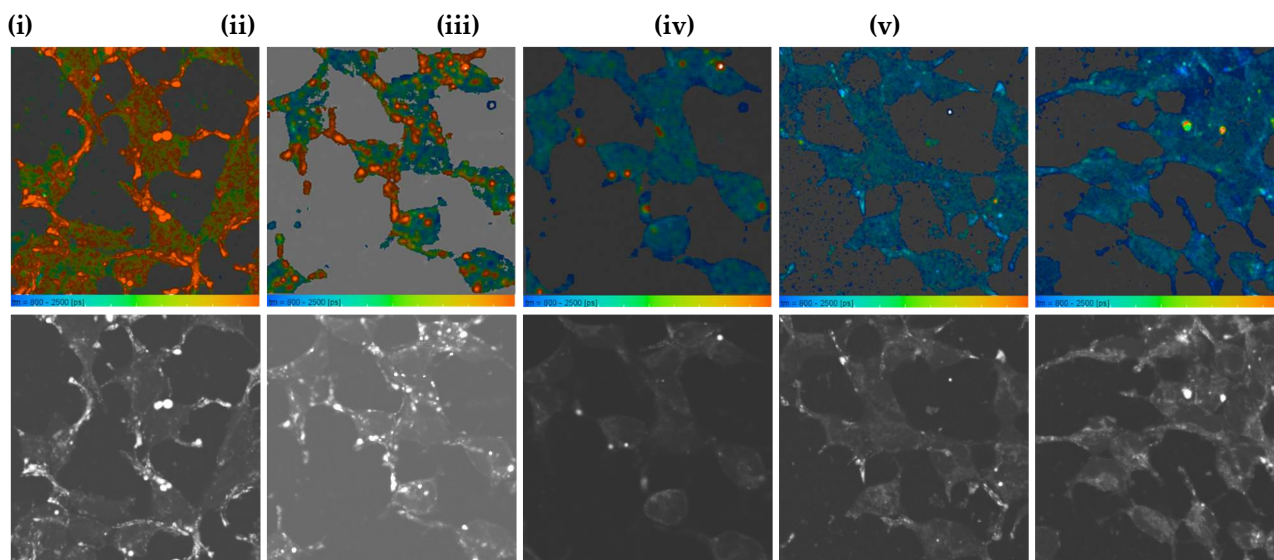

**Figure S5.** Representative fluorescence lifetime (colored) and intensity (black & white) images of HEK293 cells recorded under two-photon excitation at wavelength 840 nm, using the bp allvis emission filter. Column **(i)** depicts fluorescence images of HEK293 cells incubated for 30 min with 9-Me-Ho (50  $\mu$ M) recorded in the presence of the  $\beta$ C (50  $\mu$ M) in the external medium (EM). Columns from **(ii)** to **(iv)** depict fluorescence images recorded at 5, 12 and 45 min after washing the cells with fresh media. The mean value of average fluorescence lifetime ( $\mu$  / ns) changes from **(i)** 2.85, **(ii)** 2.29, **(iii)** 1.16 and **(iv)** 1.05. Column **(v)** depicts a representative fluorescence image of wt HEK293 cells in the absence of 9-Me-Ho (autofluorescence,  $\mu$  = 0.98).
